1 **Limited genetic variation for male mating success reveals low**  
2 **evolutionary potential for thermal plasticity in *Drosophila***  
3 ***melanogaster***

4

5 John T. Waller<sup>†</sup> (corresponding author) [john.waller@biol.lu.se](mailto:john.waller@biol.lu.se) +46 070 488 7577

6 Anna Kell<sup>†</sup>

7 Mireia Ballesta<sup>†</sup>

8 Aude Giraud<sup>†</sup>

9 Jessica K. Abbott<sup>†</sup>

10 Erik I. Svensson<sup>†</sup>

11 <sup>†</sup>Evolutionary Ecology Unit, Department of Biology, Lund University, SE-223 62 Lund,  
12 Sweden

13 Short Title: Limited genetic variation in thermal plasticity

14 Acknowledgements: We are grateful to anonymous referees for constructive criticisms earlier  
15 drafts of this manuscript. Funding for this study has been provided by the Swedish Research  
16 Council (VR; grant no. 621-2012-3768) and Gyllenstiernska Krapperupstiftelsen (grant no.  
17 2014-0032) to E.I. S.

18

19 Data is archived on <https://datadryad.org/>

20

21

22

23

24

25

26

27

28 **Abstract**

29 Populations respond to novel environmental challenges either through genetic changes,  
30 through adaptive phenotypic plasticity for the traits in question, or by a combination of these  
31 factors. Here, we investigated the evolutionary potential of phenotypic plasticity for male  
32 mating success, locomotory ability, and heating rate (a physiological performance trait) in the  
33 fruitfly *Drosophila melanogaster*, using isogenic male lines from the Drosophila Reference  
34 Genome Panel (DGRP) and hemi-clonal males. We quantified thermal reaction norms of how  
35 male mating success changed in relation to a temperate gradient, ranging from cold (18 °C)  
36 via optimal (24 °C) to hot and stressful environments (either 30 °C or 36 °C). We found  
37 significant differences in male mating success and locomotory performance between different  
38 lines, as well as significant main effects of temperature, but no significant genotype-by-  
39 environment interactions (GEI:s). A statistical power analysis revealed that the variance  
40 explained by GEI:s for thermal plasticity using this sample size is likely to be modest or very  
41 small, and represent only 4% of the total variation in male mating success. The lack of strong  
42 GEI:s for these two behavioral traits contrast with the presence of significant GEI:s for male  
43 heating rate, as measured by thermal imaging (infrared camera technology). These results  
44 suggest that sexual selection through male mating success is not likely to be efficient in  
45 mediating evolutionary rescue through changed plasticity in response to changing  
46 temperatures.

47 **Keywords:**

48 additive genetic variation, fruit fly, infrared camera, sexual selection, insects, thermal  
49 imaging, thermal performance, thermal plasticity

50

51

52

53

54 **Introduction**

55 Populations can respond to environmental challenges either evolutionarily through changes in  
56 allele frequencies or through adjustments in phenotypic plasticity (Schlichting and Pigliucci  
57 1998). Phenotypic plasticity is the capacity of a single genotype to change its phenotype under  
58 different environmental conditions (Bradshaw 1965; Roff 1997; Pigliucci 2001). Phenotypic  
59 plasticity can increase a population's mean fitness across several environments, and plasticity  
60 might increase niche space and geographical range (Ayrinhac et al. 2004; Manenti *et al.* 2015;  
61 Mather and Schmidt 2017). Responding plastically to changing environmental conditions is,  
62 however, a short-term survival strategy for a population, as there are costs and limits to  
63 plasticity (Lande 2014; Murren et al. 2015; Sgro et al. 2016), which can limit the potential to  
64 respond to sustained environmental change (Gonzalez et al. 2013).

65

66 Adaptive evolution of phenotypic plasticity requires not only that a population responds to  
67 changing environmental conditions, but the different genotypes must also differ in how they  
68 respond to these changing environmental conditions (Lande 2009; 2014; Chevin et al. 2010).  
69 A population must thus harbor enough standing genetic variation in environmental reaction  
70 norms to respond to sustained selection pressures driven by environmental change and  
71 thereby evolve adaptive phenotypic plasticity (Schlichting and Pigliucci 1998; Gonzalez et al.  
72 2013). The presence of genetic variation in phenotypic plasticity is recorded by the presence  
73 of significant genotype-by-environment interactions (GEI:s)(Schlichting and Pigliucci 1998;  
74 Lande 2009). If a population lacks such genetic variation in reaction norm slopes,  
75 microevolutionary changes in plasticity will be prevented (Sisodia & Singh 2010; Husby *et al.*  
76 2010).

77

78 Hansen and Houle (2004) argued that the vast majority phenotypic traits have large amounts  
79 additive genetic variation, even when such traits show evidence of long term stasis in the  
80 fossil record or in extant populations. However, and in contrast to this view, there are some  
81 documented empirical examples where genetic variation for physiological traits has been  
82 demonstrated to be low enough to act as an evolutionary limit (Blows & Hoffmann 2005). If a  
83 population is invariant in its evolutionary response to sustained environmental change, any  
84 change outside of a critical range should rapidly lead to population decline and ultimately  
85 extinction (Charmantier *et al.* 2008; Visser 2008; Chevin *et al.* 2010).

86

87 Thermal plasticity is a form of phenotypic plasticity that is particularly important for  
88 ectotherms, which have limited ability to buffer themselves against external temperature  
89 changes (Angilletta *et al.* 2002; Angilletta 2009). Many ectotherm species might already be  
90 close to their upper physiological thermal limits (Addo-Bediako *et al.* 2000; Deutsch *et al.*  
91 2008; Kellermann *et al.* 2012). In particular, small insects and other ectotherms may lack the  
92 ability to buffer themselves against external temperatures altogether (Stevenson 1985). This  
93 might be reflected as canalization (i.e. low genetic variance in thermal reaction norms)  
94 resulting in low thermal plasticity (Angilletta *et al.* 2002; Charmantier *et al.* 2008). In general,  
95 we know relatively little about the amount of genetic variation in thermal plasticity in natural  
96 populations. Moreover, most previous studies on thermal adaptation and thermal plasticity in  
97 insects and other ectotherms focus on how temperature affects survival and hence the  
98 implications for natural selection. In contrast, the consequences of temperature challenges for  
99 sexual selection (e.g. how mating rates and mating success is affected by temperature and  
100 thermal plasticity) has seldom been a focus for empirical investigations (see Olsson *et al.*  
101 2011 and Taylor *et al.* 2015 for exceptions). Only recently has temperature also been linked  
102 to several aspects of sexual selection and speciation in ectotherms. Examples of such recent

103 studies exploring the link between thermal adaptation and sexual selection include how  
104 melanin-based dark colouration affects body temperatures within local populations and across  
105 latitudinal clines (Punzalan et al. 2008; Svensson and Waller 2013), how different  
106 microclimatic environments reduces immigrant male viability (Gosden et al. 2015), how  
107 mating rates might be temperature-dependent (Olsson et al. 2011; Taylor et al. 2015) and a  
108 recent finding that postzygotic isolation evolves more rapidly between various species of  
109 *Drosophila* in hot tropical areas, compared to cooler temperate areas (Yukilevich 2013).

110

111 Isogenic *Drosophila melanogaster* lines offer an excellent opportunity to investigate genetic  
112 variation in thermal reaction norms. The *Drosophila* Genetic Reference Panel (DGRP) is a  
113 public resource consisting of more than 200 inbred lines derived from a population in Raleigh,  
114 North Carolina (Mackay *et al.* 2012). Since the lines are isogenic, any phenotypic differences  
115 between these lines can be attributed to genetic effects, provided that they are raised and kept  
116 under identical conditions. Here we investigate and quantify the amount of genetic variation  
117 in thermal reaction norms of 30 DGRP lines, using a hemiclinal experimental approach  
118 (Abbott & Morrow 2011), and also by comparing these different DGRP-lines directly with  
119 each other. These DGRP lines should be representative sample and a snapshot of naturally  
120 segregating genetic variation in the local populations from which they were derived (Mackay  
121 *et al.* 2012) and have also been previously used them in a study on sexual selection on wing  
122 interference patterns (WIPs)(Katayama et al. 2014).

123

124 A necessary condition for the evolution of adaptive phenotypic plasticity in a novel thermal  
125 environment is that the population harbors enough standing genetic variation in the trait of  
126 interest (Chevin et al. 2010). A relatively low amount of genetic variation would indicate that

127 the population is unlikely to respond evolutionarily to these novel thermal conditions. Here  
128 we investigate how two behavioral traits important to male fitness – male locomotion and  
129 mating success – are influenced by varying thermal conditions and whether these two fitness-  
130 related traits show any evidence for genetic variation in plasticity. We used male locomotor  
131 activity as a measure of performance as this trait is likely to be associated with fitness because  
132 of its links with reproductive success, dispersal, predator avoidance, and foraging (Gilchrist,  
133 1996; Roberts et al., 2003; Long & Rice, 2007; Latimer et al. 2011). We complemented these  
134 analyses of behavioral performance traits with an analysis of a physiological trait – heating  
135 rate – using the technique of thermal imaging (“infrared camera”) on a subset of these DGRP-  
136 lines. Heating rate is also likely to covary with physiological performance and mating success,  
137 especially in ectotherms. Thermal imaging is a technique by which body temperatures of both  
138 endotherms and ectotherms can be quantified, under laboratory, semi-natural, and natural  
139 field conditions (Tattersall et al 2009; Tattersall and Cadena 2010; Symonds and Tattersall  
140 2010; Svensson and Waller 2013).

141

## 142 **Methods**

### 143 ***Drosophila melanogaster* sources**

144 Isogenic lines used in this experiment were obtained from the *Drosophila melanogaster*  
145 Genetic Reference Panel (DGRP) of the Bloomington Stock Centre (Mackay *et al.* 2012),  
146 which were created after 20 generations of full sibling inbreeding of the stock inbred fly  
147 populations (Mackay et al. 2012). Wild type (LHm) flies were originally obtained from  
148 Edward H. Morrow (EHM), University of Sussex, Falmer, UK, and maintained in Lund since  
149 2012 in the laboratory of J. Abbott. These LHm flies originated from 400 flies collected by L

150 Harshman in central California in 1991 and they have been maintained since that time by L  
151 Harshman (1991–1995), WR Rice (1995–2004) and EHM (2004–present) (Carter et al. 2009).

152

### 153 **Producing hemiclinal males from DGRP-lines**

154 A total of 16 male DGRP flies for each isogenic line were crossed with 16 wildtype virgin  
155 LHm females (in a total of 992 vials). The outbred male offspring were then used for the  
156 mating and locomotion assays. We refer to these outbred male flies as hemi-clones, following  
157 previous terminology (Abbott and Morrow 2011). This outbreeding procedure was conducted  
158 to reduce any inbreeding effects on mating behaviour that could potentially remain among the  
159 DGRP-lines (Huang et al. 2012). Moreover, by comparing male mating success in the DGRP  
160 background vs. mating success in a hemi-clonal background, we were also able to reduce the  
161 effects of non-heritable genetic variation across the different genetic backgrounds. Additive  
162 genetic variance in male mating success is expected to produce a significant correlation in  
163 male mating success between the DGRP-lines and the corresponding male genotype in the  
164 hemi-clonal background. Conversely, a weak correlation between male mating success in  
165 these different genetic backgrounds would imply low additive genetic variance for this trait  
166 and might also indicate a large non-additive effects, arising from e.g. epistatic genetic  
167 variance (Meffert et al. 2002) or dominance variation (Merilä & Sheldon 1999). All flies were  
168 cultured in a 20mm medium of cornmeal, yeast, and molasses and kept at 25°C in an  
169 incubator, on a light-dark cycle of 12hrs:12hrs.

### 170 *DGRP-lines and hemiclinal experiments*

171 Two complementary groups of flies were used: 1) 32 pure isogenic DGRP lines, and 2) 30  
172 hemi-clonal DGRP lines (Mackay et al. 2012). Throughout this paper, we refer to these  
173 separate experimental fly categories as DGRP-lines and hemiclinal lines, respectively. For

174 the 32 pure DGRP-lines, the mating assay was performed in three test temperatures: 18°C  
175 (cold), 24°C (optimal) and 30°C (hot). We performed three replicates for each line and  
176 temperature treatments for these pure DGRP-lines for a total of 265 vials.

177 In a first pilot study using hemiclonal males, we selected 10 DGRP lines for outbreeding to  
178 produce 10 groups of hemiclonal males. These 10 DGRP lines were specifically selected for  
179 outbreeding because they showed variable patterns in their mating rates to different  
180 temperatures in the initial mating assay with the 32 pure DGRP-lines. In general, however, the  
181 individual patterns we observed in the pure DGRP lines were only weakly related to the  
182 patterns in the outbred lines (Fig. 4) (Huang et al. 2012). Hemi-clones were produced by  
183 mating 992 vials of 16 DGRP males with 16 virgin females from the outbred LH<sub>M</sub> population  
184 (Chippindale et al. 2001). Male offspring from these crosses will therefore have one set of  
185 DGRP autosomes and the Y in a random LH<sub>M</sub> background. For three test temperatures, 18°C  
186 (cold), 24°C (optimal) and 30°C (hot), we performed both mating and locomotion assays.

187

188 We followed up the first pilot hemiclonal study with a second study, where we used 30  
189 isogenic lines (DGRP) to produce a new set of 30 hemiclonal groups of males. In this follow-  
190 up study, we performed mating and locomotion assays at 18°C (cold), 24°C (optimal), 30°C  
191 (hot) and we also added one additional temperature treatment at 36°C (extremely hot) (Trotta  
192 *et al.* 2006). This temperature range is similar to what has been used in other studies (Latimer  
193 *et al.* 2011). We performed six replicates for each line and temperature treatment in this assay,  
194 although the total number of replicates will be slightly greater for those lines in which the  
195 pilot study was also included. We pooled the results from first hemiclonal study with the  
196 second to increase statistical power, while accounting for the effect of experimental sessions  
197 as a block in our statistical analyses.



198 **Mating assays**

199 Each line was anaesthetised with CO<sub>2</sub> gas. Seven males per vial were collected and placed in  
200 separate 25 x 95 mm vials (with fly medium). Seven LHm virgin females were also collected  
201 per vial, and placed in separate vials. Vials of males and females were kept at 25°C overnight,  
202 to allow recovery from anaesthesia. For the experiment, vials containing hemiclinal males  
203 (one vial per line), and vials of LHm females were placed in an incubator at the test  
204 temperature and allowed to acclimatise for 30 minutes. After this time, the flies from one  
205 female vial were transferred without anaesthesia (“flipped”) into a male vial. Vials with males  
206 and females were shaken lightly to avoid early mating while the other vials were being  
207 combined. The vials, now with 14 flies in total, were placed back in the incubator at the test  
208 temperature for 1 hour as the mating assay was conducted. One vial for each of our clonal  
209 lines (hemi or pure) was placed in the incubator at a time. For each of the test temperatures,  
210 the number of copulating pairs was used a measure of male mating success. The number of  
211 mating males in each vial could thus vary from 0 to 7, and it was recorded every 10 minutes  
212 (or 15 minutes for the pure lines) over a one hour period. Here, we are measuring a mating  
213 rate, which also captures any variation in the latency to mate. All observations were recorded  
214 each day between 9.00 and 17.00hrs. We randomized the time of day for mating observations  
215 within each line.

216 **Locomotion assay**

217 After 30 minute period of incubation, and before the flies from the male and female vials were  
218 combined, the male vials were tapped to cause all the males to fall to the bottom of the food  
219 vial. We then recorded the time required for the fastest male fly to walk up the side of the vial  
220 from the bottom of the food to the top of the vial plug (95 mm). This was repeated three times  
221 for each line and we took the average value per vial (Gibert *et al.* 2001).

## 222 **Heating rate assay**

223 Using a thermal imaging camera (NEC Avio Infrared Technologies H2640) and macro lens  
224 (NEC Avio Infrared Technologies TH92-486), we recorded the heating rate of 10 DGRP lines  
225 (see supplement for information about the specific DGRP lines used). Fly individuals from  
226 each line were cooled in a climate chamber at 5°C for 3 minutes before being removed from  
227 the chamber and allowed to heat up to room temperature (approximately 23°C) in a petri dish.  
228 Thermal images were taken every 5 seconds for around 30 seconds or when all the flies had  
229 left the petri dish. Two experimental blocks of each line were performed. We recorded how  
230 body temperature changed for each line over this time period by analyzing these thermal  
231 images using the software provided by NEC Avio (see Svensson and Waller 2013 for more  
232 methodological details).

## 233 **Statistical analyses**

234 All statistical analysis in this paper were conducted in R (R Development Core Team 2008).  
235 R-code for all the analyses are uploaded to Dryad, and details are provided in the  
236 Supplementary Material. To analyze the heating rates of 10 chosen DGRP lines, we  
237 performed an analysis of variance with temperature at each time point as the dependent  
238 variable. The following model was used:  $\text{Temp} = \text{Time} + \text{Line} + \text{Block} + \text{Time} * \text{Line} +$   
239  $\text{Time} * \text{Block} + \text{Temp} * \text{Line} * \text{Block}$ .

240

241 For the hemi-clones, we performed a two-way analysis of variance (ANOVA) with the  
242 number of matings at 10 minutes as the dependent variable, with line, temperature, and their  
243 interactions as dependent factors. In this analysis, line and temperature were both treated as  
244 categorical factors. In a follow-up analysis of these hemi-clonal males, we instead treated  
245 temperature as continuous variable, both as a simple linear term and as a quadratic term and

246 their two-way interactions with line (i.e. mating rate = Temp + Line + Temp\*Line + Temp<sup>2</sup>  
247 + Line\*Temp<sup>2</sup>). We chose to analyse temperature as both a continuous and categorical  
248 variable because both analyses have useful interpretative value. In the analysis of the pure  
249 DGRP-lines, we performed a similar two-way analysis of variance (ANOVA) with the  
250 number of matings at 15 minutes as the dependent variable and line, temperature and their  
251 interaction as independent dependent factors. In this analysis, line and temperature were also  
252 both treated as categorical factors.

253

254 We additionally performed a repeated measures analysis on the hemiclinal lines using the R-  
255 package ‘nlme’ (Pinheiro et al. 2016). We used the number of matings as the dependent  
256 variable, and experimental temperature category (18, 24, 30, 36 °C as different levels), line  
257 (the 30 hemi-clonal lines as different levels), and time (10, 20, 30, 40, 50, 60 minutes) were  
258 treated as fixed effects in this model. Vial and experimental block were treated as nested a  
259 random effects. This allowed us to control for the non-independence of the repeated mating  
260 counts over each vial.

261 The two-way interaction between line and temperature treatment in these tests, should reflect  
262 the magnitude and possible statistical significance of genotype-by-environment interaction  
263 with respect to thermal plasticity for male mating rate. Significant line-by-temperature  
264 interactions would thus indicate the presence of genetic variation in the thermal reaction  
265 norms of males belonging to different DGRP- and hemi-clones respond in terms of their  
266 mating success at different temperatures.

267 Finally, we performed a power analysis simulation to quantify the minimum amount of  
268 genetic variation in thermal reaction norms that we would be able to detect an effect in the 30  
269 hemi-clonal lines, and using a given sample size (R-code for this simulation will be provided

270 on Dryad). To analysis variation in heating rate, we performed a two-way analysis of variance  
271 (ANOVA) with the average temperature at each time point as the dependent variable and line,  
272 time, and their interactions as dependent factors, while also controlling for a block effect. An  
273 analysis modelling mating rate as a proportion is presented in the Supplementary Material  
274 (Table S1).

275

## 276 **Results**

277 We found significant variation in mating rates and locomotory performance among lines,  
278 using both the hemi-clonal and the pure DGRP lines (Tables 1-4, S1, S2, S3; Fig. 1). As  
279 expected, all lines of both hemi-clonal and pure DGRP experimental categories responded  
280 plastically to the different temperature treatments (Fig. 2). Male mating rates and locomotory  
281 performance were significantly affected by temperature (Fig 2).

282

283 For all of our statistical analyses, and for neither the hemi-clonal nor the pure DGRP assays,  
284 we did not find any statistically significant interaction between line and temperature, that  
285 would be indicative of GEI:s (Fig. 1; Tables 1-3, S1, S2, S3). Moreover, we were not able to  
286 find any evidence for a statistically significant interaction between line and the squared  
287 temperature component (Table 3), i.e. neither the slopes nor the curvatures of the thermal  
288 response curves differed significantly between lines (Fig. 1).

289

290 Visual inspection of the thermal performance curves for male mating success in Fig. 1  
291 revealed that 24 out of the 30 hemi-clonal lines peaked at intermediate temperatures (24 °C or  
292 30 °C), whereas only 6 lines had maximal mating success in the cold (18 °C) or extremely hot

293 treatments (36 °C). For the DGRP-lines, 17 peaked in male mating success at intermediate  
294 temperature (24 °C), 9 at cold temperature (18 °C) and the remaining four at 30 °C (note that  
295 the DGRP-lines were not evaluated under the extreme treatment (36 °C; see Fig. 1). However,  
296 note that the relationship between male mating success and temperature was often quite flat in  
297 the range between 18 and 24 °C, after which it dropped (Fig. 1). Taken together, these results  
298 suggest a genetically quite invariant intermediate temperature optimum and more or less flat  
299 fitness peak around 24 °C (Fig. 2). Thus, we found no evidence for any statistically significant  
300 difference between genotypes in the location of this fitness optimum and neither any evidence  
301 for different slopes of the thermal response curves or their curvatures (Table 3).

302

303 Using our statistical power simulation we were able to put a minimum bound on the genetic  
304 variation in thermal plasticity (variation in the effect of our Line x Temp interaction) (Fig. 3).  
305 The main conclusion from these simulations is that our statistical power is high enough under  
306 realistic parameter values, meaning that we should have detected a large GEI:s if they had  
307 existed (Fig. 3). The magnitude of the GEI we recorded in these experiments can explain at  
308 most 4% of variation in mating rate. For instance, our statistical power approaches one with  
309 an effect size of 0.03 (treating temperature as a continuous variable) and 0.15 (treating  
310 temperature as a categorical variable)(Fig. 3). Finally, at 18° and 30° C there was no  
311 detectable correlations between the mating rate of the hemi-clones and our DGRP lines. At  
312 24° C, there was a slightly stronger and significant correlation between the mating rates of the  
313 DGRP and hemi-clonal males (Fig. 4).

314

315 In the analysis of heating rates using thermal imaging, we found significant variation among  
316 the 10 DGRP-lines we investigated, and a significant Line x Time interaction (Fig. 5; Table

317 5). This shows that for these 10 DGRP-lines, the slopes of the thermal reaction norms  
318 differed, although the effect was significant only in the first experimental block (Fig. 5; Table  
319 5).

320

## 321 **Discussion**

322 Evolutionary change requires genetic variation in the traits under selection (Blows &  
323 Hoffmann 2005). This basic requirement for evolutionary change also applies to a trait like  
324 thermal plasticity, and the evolution of thermal plasticity will require genetic variation in the  
325 slopes of thermal reaction norms. In this study, we have found significant genetic variation in  
326 male mating rates, using two different approaches: a pure-clonal approach (using a subset of  
327 un-manipulated DGRP-lines bred by Mackay et al. 2012) and a hemi-clonal approach (Abbott  
328 and Morrow 2011), where these DGRP-lines were introduced into an outbred LH<sub>M</sub>  
329 background (Fig. 1). Using these two complementary experimental approaches, we found no  
330 statistically significant variation in the reaction norm of male mating rate to temperature in the  
331 different lines (Figs. 1, 3). This shows that although all these lines altered their mating rates in  
332 relation to temperature (i.e. phenotypic plasticity; Fig. 1, Table 1-4) the changes were parallel  
333 and all lines responded in a similar manner. This implies that genetic variation in thermal  
334 plasticity for male mating success is low (Fig. 1), explaining at most 4 % of the variation (Fig.  
335 3). Similar conclusions apply to male locomotory performance (Fig. 2), where we also did not  
336 find any evidence for significant GEI (Table 4).

337

338 The lack of strong GEI:s for these two behavioural traits contrasts our findings of a significant  
339 GEI for male heating rate, a physiological performance trait, measured using thermal imaging  
340 (Fig. 5), where we did find evidence for GEI (Table 5). Heating rate is an important fitness

341 trait for ectotherms because it might covary with ability to adjust to natural ambient  
342 temperatures. It also measures the capacity of an individual to buffer itself against the  
343 ambient environmental temperatures. The use of thermal imaging is a very powerful tool to  
344 quantify genetic and phenotypic variation of a physiological trait like heating rate, as done in  
345 previous studies of non-model organisms (Tattersall et al 2009; Tattersall and Cadena 2010;  
346 Symonds and Tattersall 2010; Svensson and Waller 2013). The fact that the significant GEI  
347 for thermal reaction norm slopes in these heating rates have no counterpart in the behavioural  
348 assays of mating rates and locomotory assays (Figs. 1-2; Tables 1-4) might be biologically  
349 important. Behavioural traits and life-history traits are further downstream than the  
350 physiological traits are from the genes that govern phenotypic traits (Price and Schluter 1991),  
351 hence genetic variation on these grounds expected to be lower for such higher-level traits,  
352 such as mating rate and locomotory performance.

353

354 Overall, and across all lines, male mating success was maximal at 24 °C (DGRP-lines) or at  
355 either 24 °C or 30 °C (Fig. 2), with a few exceptions (Fig. 1). This suggests that the thermal  
356 optimum for male mating success falls well within the normal temperature range *Drosophila*  
357 *melanogaster* will experience in North Carolina in the wild (Annual high temperature: 21.5°,  
358 Annual low temperature: 9.3°, Average temperature: 14.9° C (Daly 2000)), where these  
359 DGRP-lines originated (Mackay et al. 2012). Thus, although our results suggests limited  
360 evolutionary potential for thermal plasticity with respect to male mating success, they are  
361 consistent with males being locally adapted with respect to their local temperature regime,  
362 consistent with a previous study on *Drosophila melanogaster* (Dolgin et al. 2006, Latimer et  
363 al. 2011).

364 These DGRP lines were derived from field-caught flies and variation among these lines  
365 should reflect naturally segregating genetic variation in the source population (Mackay *et al.*  
366 2012). Using a statistical power simulation (Fig. 3), we were able to put a minimum bound on  
367 the amount of variation in reaction norms in our clonal lines. The line effect had a standard  
368 deviation of  $< 0.5$ , which implies that variation in mating rate was at a maximum less than  
369 0.01 matings for any given temperature. Comparing the slopes of the reaction norms from  
370 optimal temperature condition (24° C) to extreme temperature condition (36° C), we conclude  
371 that the standard deviation in slopes is likely  $< 0.01$ . This effect covers only about 4% of the  
372 total variation in male mating success (Line = 11%, Temp = 58%, Block = 21%, Line:Temp =  
373 4%, Residual = 5%). This means that lines varied less than around  $\pm 0.008$  matings (in 10 min)  
374 per 1° C (Fig. 3). Whether this low amount of variation in thermal reaction norms would allow  
375 for evolution of adaptive phenotypic plasticity is an open question and depends on several  
376 other ecological and evolutionary factors, including population size, the strength of selection,  
377 the rate of environmental change, generation time, and intrinsic rate of increase (Hoffmann  
378 2010; Chevin *et al.* 2010). However, we note that the effect sizes in these power calculations  
379 are minimum effect sizes, and the true amount of genetic variation in thermal plasticity might  
380 be considerably lower.

381

382 One concern is that mating rate is the product of the behaviour of multiple individuals  
383 interacting, so it is not only the male's behaviour that matters, but also the female's  
384 preference. For instance, LHm females prefer males from some of the DGRP-lines more than  
385 males from other DGRP-lines. A second concern is that it is the additive genetic variation that  
386 determines the evolutionary potential of a population, yet the hemi-clones still share the  
387 same half-genome, so any epistatic effects arising from interactions between chromosomes  
388 within the DGRP half will also be included. Our experimental design is for these reasons



389 conservative with respect to our ability to detect significant GEI:s, since the line-effects will  
390 partly also include non-additive effects. Additionally, there might exist variation in latency to  
391 mate after a disturbance between lines, and this might be of some concern. However, any  
392 differences in willingness to mate after disturbance will be captured by the line effect in our  
393 statistical analyses. This means that lines might differ not only mating rate per se but also in  
394 their willingness to mate at each temperature. This variation in willingness to mate after a  
395 disturbance would not interfere with detecting GEI:s in mating rate, unless there was an  
396 interaction between the latency to mate and temperature treatment.

397

398 For the hemi-clonal lines, epistatic effects would not be included by the line factor, since our  
399 starting iso-genetic lines (30) were homozygous at all loci. Thus, epistatic interactions with  
400 the outbred (LHm) genetic background would not be included in the line effect, and would  
401 become part of the error variance. Such epistatic genetic variance would represent hidden  
402 genetic variation that we were not able to detect with our hemi-clonal lines (Huang *et al.*  
403 2012; Mackay 2014). Epistatic variance of traits related to mating success, such as courtship,  
404 have been demonstrated for other species of flies (Meffert et al. 2002). In these previous  
405 studies it has been shown that such epistatic variance can be converted to additive genetic  
406 variance following population bottlenecks (Meffert et al. 2002). From a theoretical viewpoint,  
407 traits that are closely related to fitness such as male mating success (a major fitness  
408 component) are expected to show low additive genetic variance, due to the depleting effects  
409 of strong directional sexual selection (Rowe & Houle 1996). Directional sexual selection  
410 should therefore expect reduce the additive genetic variance fraction for male mating success,  
411 resulting in a relatively higher fraction of the remaining genetic variation being non-additive,  
412 reflecting either epistatic (Meffert et al. 2002) or dominance variance (Merilä & Sheldon  
413 2002). Such non-additive genetic variance for male mating success could potentially explain

414 the low concordance between male mating success in the DGRP-lines and the hemi-clonal  
415 lines (Fig. 4). This interpretation of high epistatic variance for male mating success in these  
416 DGRP-lines would be consistent with previous studies of these DGRP-lines, where high  
417 epistatic variance was found for a number of other fitness-related traits, including cold  
418 tolerance (measured as chill coma recovery) (Huang et al. 2012).

419

420 Our results have some implications for the prospects of evolutionary rescue through the  
421 evolution of adaptive phenotypic plasticity (Chevin et al. 2013) and by sexual selection  
422 (Candolin & Heuschele 2008). Previous laboratory experiments on several species of  
423 *Drosophila* (Holland 2002; Rundle et al. 2006) and seed beetles *Callosobruchus maculatus*  
424 (Martinossi-Allibert et al. 2016) have found at most weak or at best mixed support for sexual  
425 selection improving the rate of evolution of local adaptation to novel stressful environments,  
426 such as thermally challenging environments. The results in the present study add to this small  
427 but growing body of literature, and indicate that thermal plasticity for male mating success is  
428 unlikely to evolve, as the genetic variation in thermal reaction norms is limited (Fig. 3). Some  
429 theoretical models suggest that sexual selection could improve environmental adaptation at  
430 low demographic costs, due to purging of deleterious alleles in males (Agrawal 2001; Siller  
431 2001; Whitlock & Agrawal 2009). However, the results in this and other experimental studies  
432 (cited above) give only weak support to these models. Thus, our results provide only limited  
433 support to the hypothesis that sexual selection could act as an evolutionary rescuer of  
434 populations experiencing rapid environmental change (Candolin & Heuschele 2008).

435

436 Our results also agree with other research in this area showing that evolutionary responses to  
437 novel and challenging thermal conditions may be constrained (Bennett & Lenski 1993;

438 Kellermann *et al.* 2009; Mitchell & Hoffmann 2010; Hoffmann 2010; Kelly *et al.* 2012; Kelly  
439 *et al.* 2013; Kristensen *et al.* 2015). In particular, ectotherms, particularly those living in  
440 tropical areas that already experience temperatures close to their upper thermal tolerance  
441 limits might have a reduced capacity to adapt to higher temperatures via evolutionary means  
442 (Araujo *et al.* 2013; Kristensen *et al.* 2015) (Fig 2). Insights from studies of niche  
443 conservatism also suggests that it might be difficult for many species to evolve new  
444 physiological limits (Parsons 1982; Kimura & Beppu 1993; Wiens & Graham 2005;  
445 Kellermann *et al.* 2009; Hoffmann 2010). For example, the invasive species *Drosophila*  
446 *subobscura* has a range in the Americas that is restricted to climates that are similar to those  
447 found in its native range in Europe (Prevosti *et al.* 1988; Gilchrist *et al.* 2008; Huey & Pascual  
448 2009; Hoffmann 2010). However, some natural *Drosophila* populations have adapted to their  
449 local climates (Trotta *et al.* 2006). For instance, warm-adapted populations in India have  
450 higher levels of desiccation resistance and melanism compared with cold-adapted populations  
451 (Parkash *et al.* 2008). Similarly, populations in Africa are more viable at warm temperatures  
452 than temperate populations (Bouletreau-Merle *et al.* 2003; David *et al.* 2004; David *et al.*  
453 2005; Hoffmann 2010). Other laboratory studies have shown that populations might have the  
454 capacity to adapt to temperature via evolutionary adaptation (Hoffmann 2010; Latimer *et al.*  
455 2011; Mukuka *et al.* 2010; Hoffmann *et al.* 2013; van Heerwaarden and Sgro 2013;  
456 Blackburn *et al.* 2014; van Heerwaarden *et al.* 2016). For example, in some laboratory  
457 experiments, *Drosophila* have been successfully selected for increased survival after cold and  
458 heat shocks (Bubliy & Loeschcke 2005). Finally, it might be that the expression of additive  
459 genetic variation for heat tolerance is contingent on developmental temperature (van  
460 Heerwaarden *et al.* 2016). For instance, two rainforest *Drosophila* species exhibited  
461 significant levels of additive genetic variation when raised in warmer environments, but not  
462 when raised at 25°C (van Heerwaarden *et al.* 2016).

## 463 **Conclusions**

464 The capacity of natural populations of *Drosophila melanogaster* to adapt evolutionarily (i.e.  
465 via changing the genetic composition of the population) to novel thermal conditions through  
466 the evolution of adaptive phenotypic plasticity remains an open question. In this study, we  
467 were not able to detect any significant genetic variation in thermal reaction norms to different  
468 thermal environments in either the DGRP-lines or the hemi-clonal lines. However, we were  
469 able to put a lower bound on the amount of genetic variance in thermal plasticity. Isogenic  
470 lines such as these DGRP-lines in combination with hemi-clonal approaches offer  
471 opportunities to quantify genetic variation in phenotypes where the underlying genotypes are  
472 known and line-differences can attributed to genetic differences without the need for complex  
473 breeding designs (Abbott & Morrow 2011). Such isogenic lines could also be raised in  
474 different temperatures in the future, which might reveal that significant genetic variation  
475 exists, but this variation might depend on temperatures experienced during the larval  
476 development stage (van Heerwaarden et al. 2016). It is possible that GEI:s might be more  
477 pronounced among juveniles, and that strong selection during these earlier life stages might  
478 have reduced additive genetic variance in thermal reaction norms that could be detected  
479 during the adult stage (cf. Martinossi-Allibert et al. 2016). In the present study, we were not  
480 able to detect any significant genetic variation in thermal plasticity in adult male mating  
481 success or locomotion.

## 482 **Figure Legends**

483

484 **Fig 1.** Thermal reaction norms of male mating success estimated for of each pure DGRP  
485 (black) and hemi-clonal (empty) DGRP-line in relation to experimental temperature  
486 treatments. Numbers above each sub-panel refer to the DGRP-lines described in Mackay et al.

487 (2012). Although temperature affects mating rates in all lines and often peaks at intermediate  
488 temperatures, there is no evidence for any genotype-by-environment interaction with respect  
489 to temperature, i.e. the mating success of the different lines are similarly affected across  
490 environmental treatments. Mating rate is the number of copulations that were recorded in a  
491 vial after 10 minutes (for the hemiclones) and after 15 minutes (for the pure clones). The  
492 mating assay was only performed for some lines with either only the hemi-clones (303, 486)  
493 or only the pure lines (305, 315). Confidence intervals (95%) are shown as vertical lines.

494

495 **Fig 2.** Temperature-related male performance for the hemi-clonal males showed as male  
496 locomotory performance (left panel) and male mating rate (right panel). Males from different  
497 lines vary in mean mating rates and locomotory performance (intercepts), but variation  
498 between lines in thermal reaction norms (slopes) is low (Fig. 1). Hence, there is no evidence  
499 for significant genetic variation in the thermal reaction norms (Fig. 1). Each data point  
500 represents the mean performance of each line at each temperature treatment.

501

502 **Fig 3.** Power plots to detect significant GEI:s (reflected as Line\*Temp interactions) for male  
503 mating success. Temperature is either treated as continuous variable (left plot) or as a discrete  
504 experimental factor (right plot). Comparing the slopes of the reaction norm (left panel) from  
505 optimal temperature to extreme (hemiclonal lines: 24° to 36° C; pure DGRP-lines: 24° to 30°  
506 C), we found that the standard deviation in slope is likely to be  $< 0.01$  for the hemi-clonal  
507 lines and  $< 0.025$  for the pure DGRP-lines. This means that lines varied in less  $\pm 0.008$   
508 matings (per 10 min) per 1° C. Treating temperature as discrete (right panel), the standard  
509 deviation of this Line\*Temp effect is most likely  $< 0.07$  for the hemi-clonal lines and  $< 0.12$   
510 for the pure clonal lines. This means that the variation in mating rate is maximally  $< 0.01$

511 matings for a given temperature. These are minimum effect sizes, and the true variation in  
512 thermal plasticity is likely to be lower. R-code for these power simulations are provided on  
513 Dryad. Each data point represents 1000 simulations (hemi-clonal:  $n = 7$  and pure-clonal:  $n = 3$   
514 replicates per line  $n = 30$ ).

515

516 **Fig. 4.** Correlations between mating rates (at 10 min and 15 between our hemi-clonal and  
517 DGRP lines, measured at three different temperatures (measured at 18 °C (“cold” = white), 24  
518 °C (“optimal” = gray) and 30 °C (“hot” = black). We studied a total of 28 Lines per  
519 temperature treatment, i.e. the total number of datapoints in this graph is 84). The “random”  
520 Lhm genetic background in our hemi-clonal lines likely has a large effect on mating rate,  
521 since the mating rates the DGRP-lines, put either in to hemi-clones or measured as pure  
522 clones show only weak non-significant relationships (All:  $r=0.12$ ,  $P=0.24$ ,  $N=84$ , 18C:  $r$   
523  $=0.08$ ,  $P = 0.68$ ,  $N=29$ ; 24C:  $r= 0.37$ ,  $P=0.05$ ,  $N=29$ ; 30C:  $r= 0.10$ ,  $P=0.61$ ,  $N=29$ ). The lack  
524 of strong significant correlations between the mating rates of the different lines in different  
525 genetic backgrounds indicates low additive genetic variance in male mating success and  
526 implies strong epistatic effects on mating rate (Huang et al. 2012), as our hemi-clonal and  
527 pure-clonal lines will only share the additive effects of their genotypes.

528

529 **Fig 5. A)** Heating rates of 10 DGRP lines after exposure to a cool shock 5°C for 3 minutes and  
530 then allowed to recover at room temperature for 30 seconds. Two experimental blocks were  
531 performed of these same 10 DGRP lines. Thermal images were taken every 5 seconds.  
532 Heating rate was significantly variable between lines in block 1 but not in block 2 (Table 5).

533

534

535

536

537

## 538 **Figures and Tables**

539 **Table 1.** Analysis of variance (ANOVA) for the mating rate in hemi-clonal males. Line  
540 (N=30) and temperature (N=4; 18,24,30,36 °C) were both treated as categorical factors. We  
541 used the first mating observation at 10 minutes to avoid double counting matings at the next  
542 observation time 20 minutes. Here, a significant Line x Temp interaction would be indicative  
543 of a GEI and reveal significant genetic variation (greater than zero) in plasticity in our hemi-  
544 clonal males. Block is a categorical factor (N=2), which controls for differences in the two  
545 experimental runs. See table S1 in the supplementary material and a model wherein mating  
546 rate is treated as a proportion.

| Term        | DF  | SSE   | MSE  | F-value | P-value | Significance |
|-------------|-----|-------|------|---------|---------|--------------|
| Line        | 29  | 4.54  | 0.16 | 2.37    | <0.0001 | ****         |
| Temp        | 3   | 2.48  | 0.83 | 12.51   | <0.0001 | ****         |
| Block       | 1   | 0.3   | 0.3  | 4.52    | 0.034   | *            |
| Line x Temp | 87  | 4.88  | 0.06 | 0.85    | 0.83    | ns           |
| Residuals   | 870 | 57.38 | 0.07 |         |         |              |

547

548

549

550

551

552

553

554

555

556 **Table 2.** Analysis of variance (ANOVA) for the mating rate of the DGRP males. Line (N=32)  
557 and temperature (N=3; 18,24,30 °C) were both treated as categorical factors. We used the first  
558 observation time at 15 minutes to avoid double counting matings at the next observation time  
559 30 minutes. A significant Line x Temp interaction would be indicative of a GEI.

| Term        | DF  | SSE  | MSE  | F-value | P-value | Significance |
|-------------|-----|------|------|---------|---------|--------------|
| Line        | 31  | 5.22 | 0.17 | 3.55    | <0.0001 | ****         |
| Temp        | 2   | 1.31 | 0.66 | 13.82   | <0.0001 | ****         |
| Line x Temp | 58  | 2.35 | 0.04 | 0.86    | 0.752   | ns           |
| Residuals   | 172 | 8.16 | 0.05 |         |         |              |

560

561

562

563

564

565

566

567

568



569

570

571

572

573 **Table 3.** Analysis of covariance (ANOVA) for the mating rate hemi-clonal males. Here Line  
574 (N=30) is treated as a categorical factor and temperature is treated as a continuous variable.  
575 The quadratic effect of temperature (Temp<sup>2</sup>) allows the model to detect any curvature in the  
576 reaction of mating rate to temperature. We used the first observation time at 10 minutes to  
577 avoid double counting matings at the next observation time 20 minutes. Here, a significant  
578 Line x Temp interaction would be indicative of a GEI, and indicate significant genetic  
579 variation (greater than zero) in plasticity in our hemi-clonal males. Block is a categorical  
580 factor (N=2), which controls for differences in the two experimental runs.

| Term                     | DF  | SSE   | MSE  | F-value | P-value | Significance |
|--------------------------|-----|-------|------|---------|---------|--------------|
| Line                     | 29  | 4.54  | 0.16 | 2.41    | <0.0001 | ****         |
| Temp                     | 1   | 0.02  | 0.02 | 0.34    | 0.557   | ns           |
| Temp <sup>2</sup>        | 1   | 2.39  | 2.39 | 36.81   | <0.0001 | ****         |
| Block                    | 1   | 0.31  | 0.31 | 4.82    | 0.028   | *            |
| Line x Temp              | 29  | 2.27  | 0.08 | 1.2     | 0.212   | ns           |
| Line x Temp <sup>2</sup> | 29  | 1.67  | 0.06 | 0.89    | 0.641   | ns           |
| Residuals                | 900 | 58.38 | 0.06 |         |         |              |

581

582

583

584

585

586

587

588

589

590

591 **Table 4.** Analysis of locomotion performance in the hemi-clonal lines (N=30). Locomotion  
592 is the speed (mm/seconds) of the fastest hemiclinal male (7 per vial) to walk up the side of  
593 the vial (repeated 3 times for each line) at the different experimental temperatures. We  
594 performed a two-way analysis of variance (ANOVA) with locomotion time the as the  
595 dependent variable and line, temperature and their interaction as independent dependent  
596 factors.

| Term        | DF  | SSE      | MSE     | F-value | P-value | Significance |
|-------------|-----|----------|---------|---------|---------|--------------|
| Line        | 29  | 4197.69  | 144.75  | 1.76    | 0.009   | **           |
| Temp        | 3   | 7449.08  | 2483.03 | 30.22   | <0.0001 | ****         |
| Line x Temp | 87  | 5691.16  | 65.42   | 0.8     | 0.907   | ns           |
| Residuals   | 592 | 48635.14 | 82.15   |         |         |              |

597

598

599

600

601

602

603

604

605

606

607

608

609

610

611 **Table 5.** Analysis of variance (ANOVA) for the heating rate of DGRP males. 2 replicates of  
612 Lines (N=10). Time is measured in seconds. A thermal image was taken at each time point.  
613 Here, a significant Line x Time interaction would be indicative of significant variation in  
614 heating rate between lines. However, a significant Time x Line x Block effect complicates  
615 this interpretation. Block is a categorical factor (N=2), which controls for differences in the  
616 two experimental runs.

| Term                | DF | SSE    | MSE    | F-value | P-value | Significance |
|---------------------|----|--------|--------|---------|---------|--------------|
| Time                | 1  | 135.14 | 135.14 | 290.3   | <0.0001 | ***          |
| Line                | 9  | 42.62  | 4.74   | 10.17   | <0.0001 | ***          |
| Block               | 1  | 35.44  | 35.44  | 76.13   | <0.0001 | ***          |
| Time x Line         | 9  | 9.46   | 1.05   | 2.26    | 0.024   | *            |
| Time x Block        | 1  | 3.94   | 3.94   | 8.47    | 0.004   | **           |
| Line x Block        | 9  | 16.48  | 1.83   | 3.93    | 0.0002  | ***          |
| Time x Line x Block | 9  | 8.47   | 0.94   | 2.02    | 0.04    | *            |
| Residuals           | 95 | 44.22  | 0.47   |         |         |              |

617

618

619

620

621

622

623

624

625

626

627

628

629

630

631

632

633

634

635

636

637

638

639

640

641

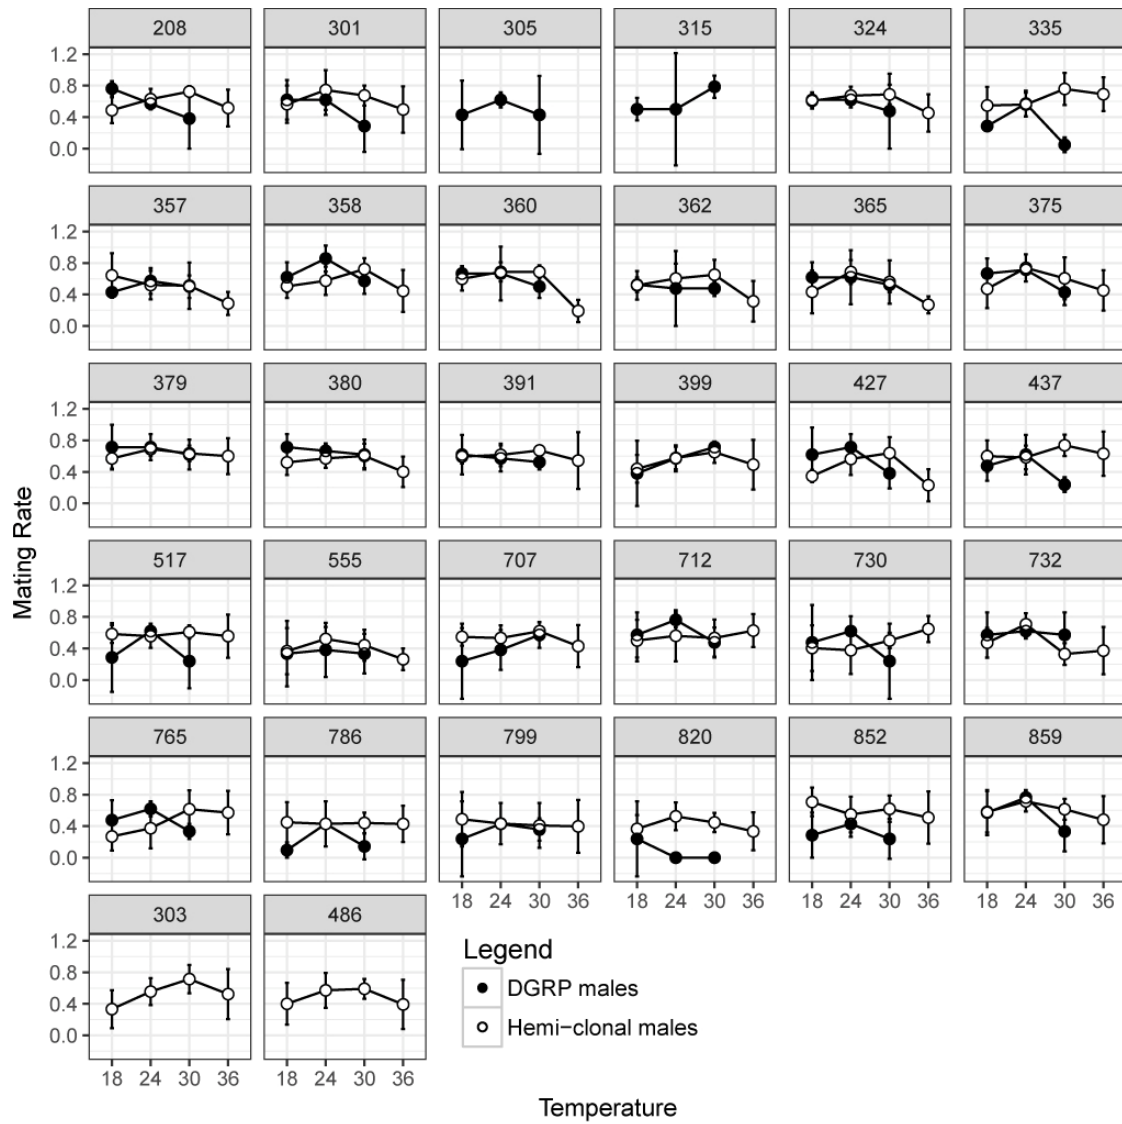

642

643

644

645

646

647

648

649

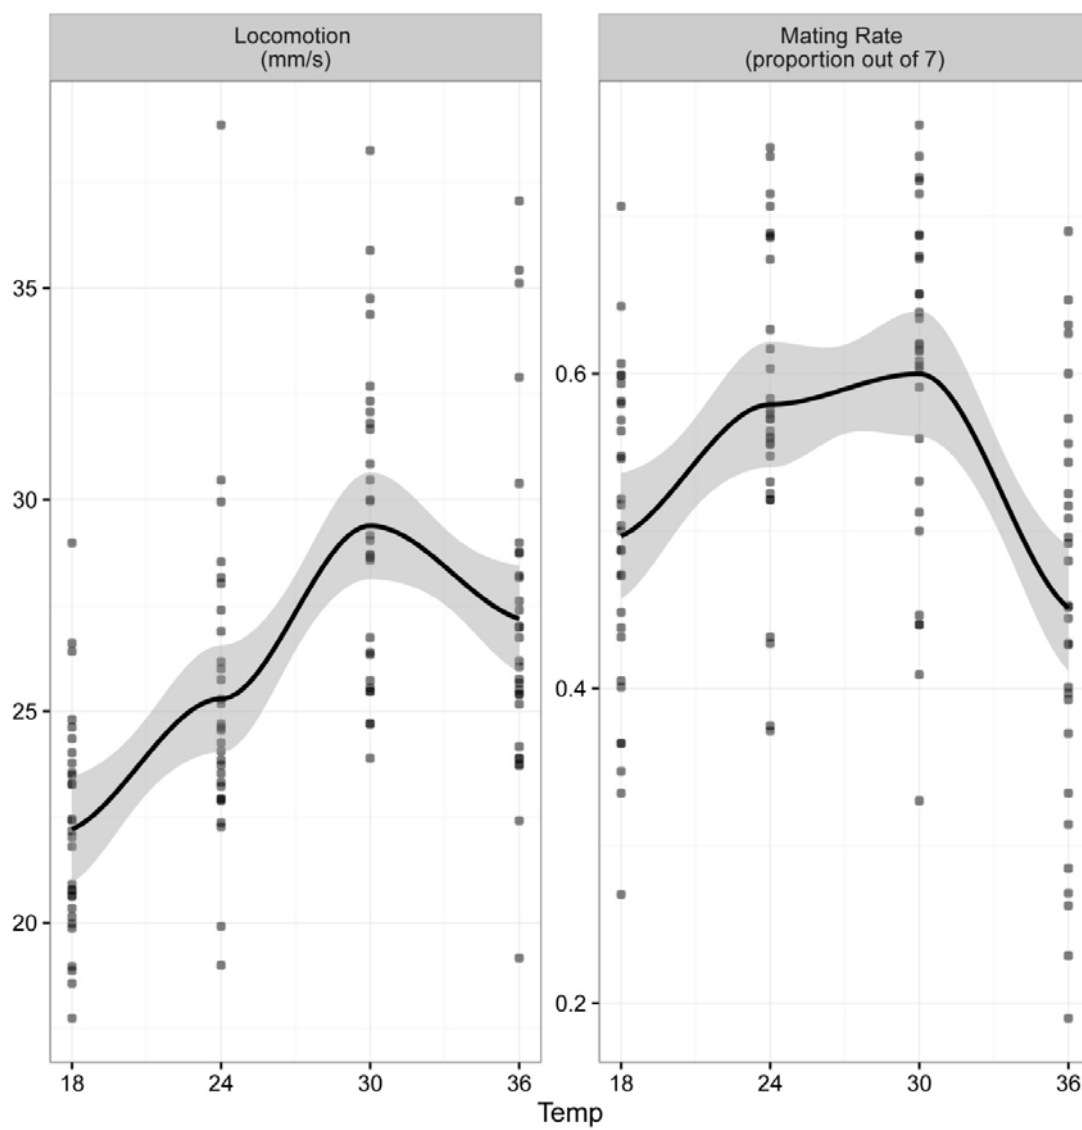

650

651

652

653

654

655

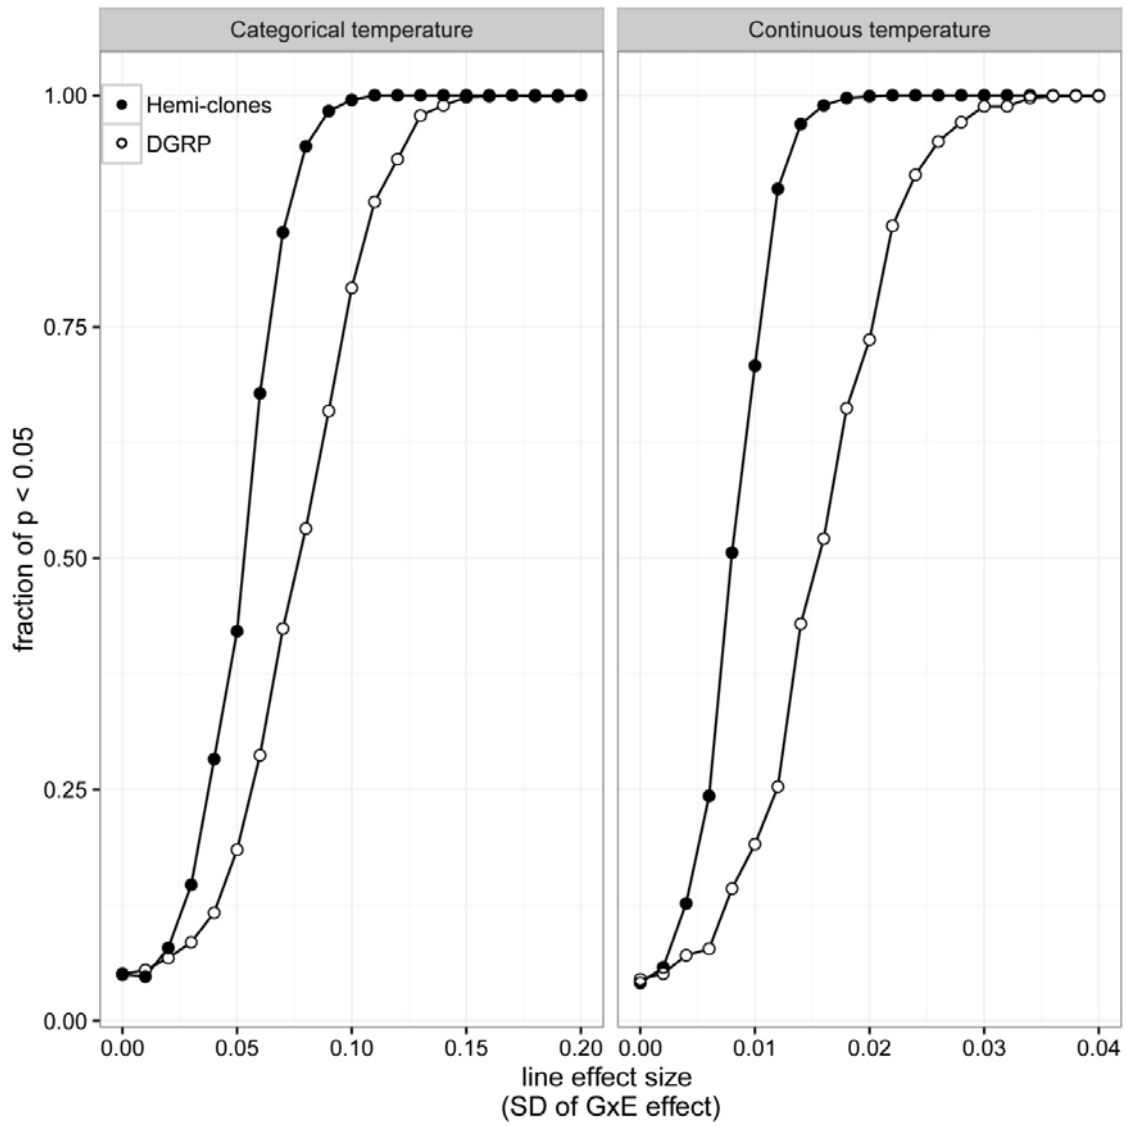

656

657

658

659

660

661

662

663

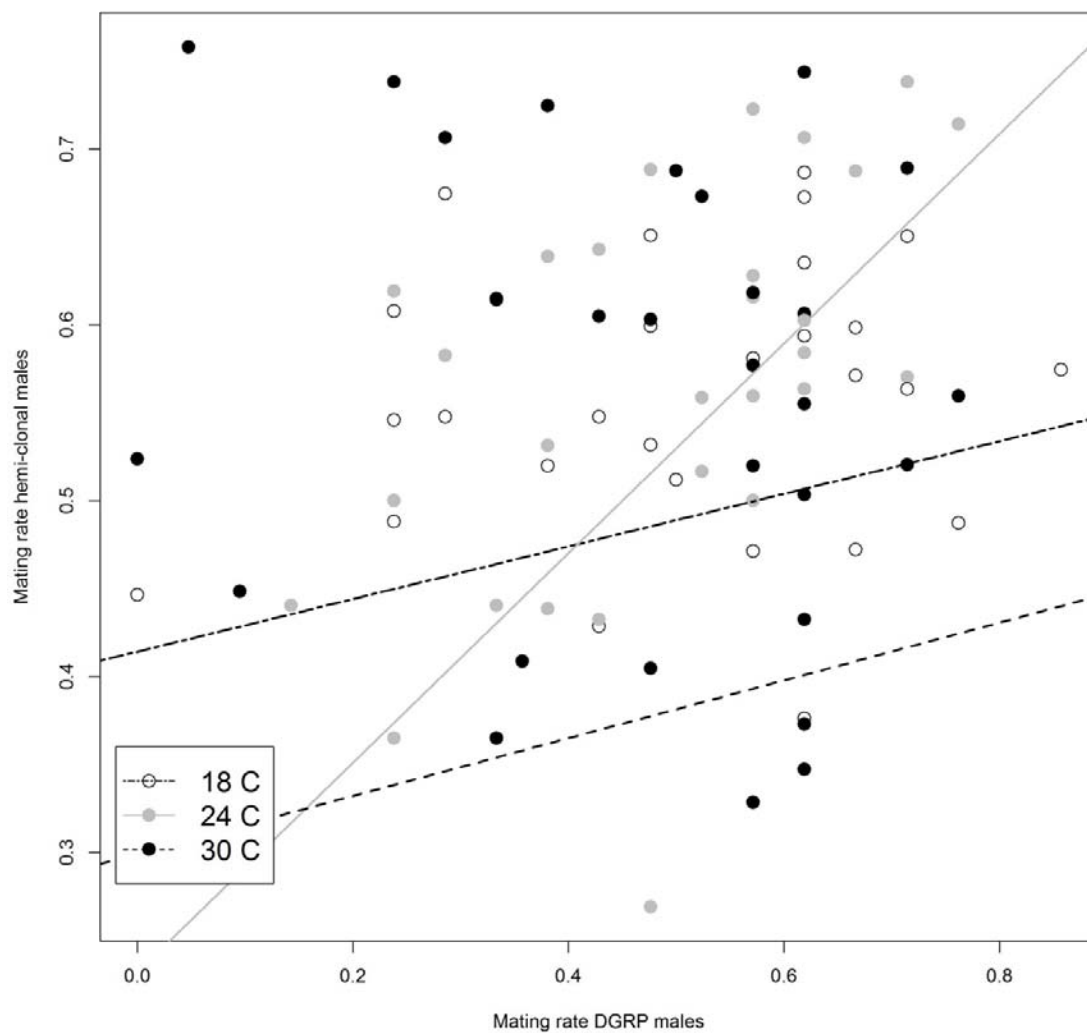

664

665

666

667

668



669  
670  
671  
672  
673  
674  
675  
676  
677  
678  
679

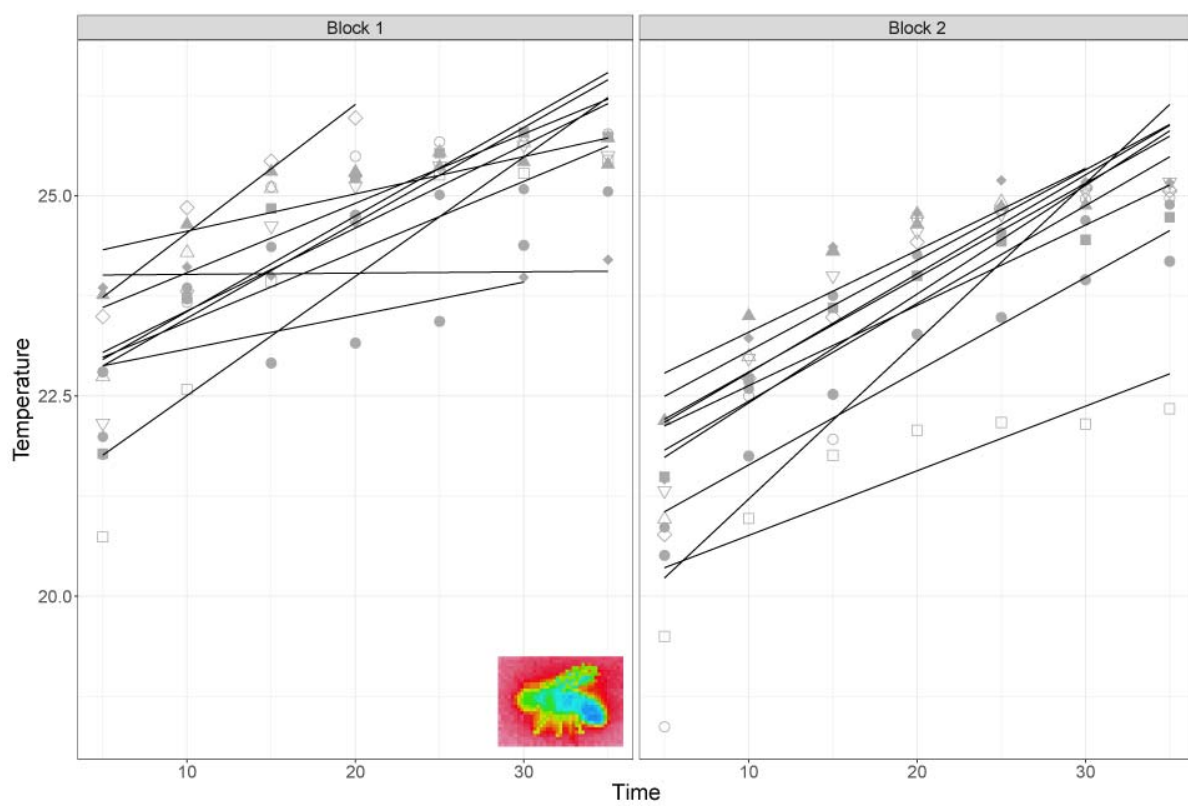

680  
681  
682  
683  
684

685

686

687

688

689 **References**

690 Abbott, J. K. and E. H. Morrow. 2011. Obtaining snapshots of genetic variation using hemiclinal  
691 analysis. *Trends Ecol. Evol.* **26**: 359-368.

692 Addo-Bediako, A., S. L. Chown and K. J. Gaston. 2000. Thermal tolerance, climatic variability and  
693 latitude. *Proc. R. Soc. Lond., B, Biol. Sci.* **267**: 739-745.

694 Agrawal, A.F. 2001. Sexual selection and the maintenance of sexual reproduction. *Nature* **411**: 692-  
695 695.

696 Angilletta, M. J. 2009. Thermal adaptation: a theoretical and empirical synthesis. Oxford University  
697 Press, Oxford.

698 Angilletta, M. J., P. H. Niewiarowski and C. A. Navas. 2002. The evolution of thermal physiology in  
699 ectotherms. *J. Therm. Biol.* **27**: 249-268.

700 Araujo, M. B., F. Ferri-Yanez, F. Bozinovic, P. A. Marquet, F. Valladares and S. L. Chown. 2013.  
701 Heat freezes niche evolution. *Ecol. Lett.* **16**: 1206-1219.

702 Ayrinhac, A., V. Debat, P. Gibert, A. G. Kister, H. Legout, B. Moreteau, R. Vergilino, and J. R.  
703 David. 2004. Cold adaptation in geographical populations of *Drosophila melanogaster*: phenotypic  
704 plasticity is more important than genetic variability. *Funct. Ecol.* **5**: 700-706.

705 Bennett, A. F. and R. E. Lenski. 1993. Evolutionary adaptation to temperature II. Thermal niches of  
706 experimental lines of *Escherichia coli*. *Evolution* **47**: 1-12.

707 Blackburn, S., B. van Heerwaarden, V. Kellermann and C. M. Sgro. 2014. Evolutionary capacity of  
708 upper thermal limits: beyond single trait assessments. *J. Exp. Biol.* **217**: 1918-1924.

709 Blows, M. W. and A. A. Hoffmann. 2005. A reassessment of genetic limits to evolutionary change.  
710 *Ecology*, **86**: 1371-1384.

711 Bouletreau-Merle, J., P. Fouillet and J. Varaldi. 2003. Divergent strategies in low temperature  
712 environment for the sibling species *Drosophila melanogaster* and *D. simulans*: overwintering in  
713 extension border areas of France and comparison with African populations. *Evol. Ecol.* **17**: 523-548.

714 Bradshaw, A. D. 1965 Evolutionary significance of phenotypic plasticity in plants. *Adv.*  
715 *Genet.* **13**:115-155.

716 Bublly, O. A. and V. Loeschcke. 2005. Correlated responses to selection for stress resistance and  
717 longevity in a laboratory population of *Drosophila melanogaster*. *J. Evol. Biol.* **18**: 789-803.

718 Candolin, U. and J. Heuschele. 2008. Is sexual selection beneficial during adaptation to environmental  
719 change? *Trends Ecol. Evol.* **23**: 446-452.

- 720 Carter, A. J. R., T. M. Weier and D. Houle. 2009. The effect of inbreeding on fluctuating asymmetry  
721 of wing veins in two laboratory strains of *Drosophila melanogaster*. *Heredity* **102.6**: 563-572.
- 722 Charmantier, A., R. H. McCleery, L. R. Cole, C. Perrins, L. E. B. Kruuk and B. C. Sheldon. 2008.  
723 Adaptive phenotypic plasticity in response to climate change in a wild bird population. *Science*, 320:  
724 800-803.
- 725 Chevin, L. M., R. Gallet, R. Gomulkiewicz, R.D. Holt, and S. Fellous. 2013. Phenotypic plasticity in  
726 evolutionary rescue experiments. *Philos. Trans. R. Soc. Lond., B, Biol. Sci.* **368**: 89-99.
- 727 Chevin, L. M., R. Lande and G. M. Mace. 2010. Adaptation, plasticity, and extinction in a changing  
728 environment: Towards a predictive theory. *PLoS Biol.* **8**: e1000357.
- 729 Chippindale, A. K., R. G. Jonathan and R. R. William. 2001. Negative genetic correlation for adult  
730 fitness between sexes reveals ontogenetic conflict in *Drosophila*. *Proc. Natl. Acad. Sci.* **98.4**: 1671-  
731 1675.
- 732 Daly, C., G. H. Taylor, W. P. Gibson, T. W. Parzybok, G. L. Johnson and P. A. Pasteris, 2000. High-  
733 quality spatial climate data sets for the United States and beyond. *Trans. ASAE* **43**: 1957-1967.
- 734 David, J. R., L. O. Araripe, M. Chakir, H. Legout, B. Lemos, G. Petavy, C. Rohmer, D. Joly and B.  
735 Moreteau. 2005. Male sterility at extreme temperatures: a significant but neglected phenomenon for  
736 understanding *Drosophila* climatic adaptations. *J. Evol. Biol.* **18**: 838-846.
- 737 David, J. R., R. Allemand, P. Capy, M. Chakir, P. Gibert, G. Petavy and B. Moreteau. 2004.  
738 Comparative life histories and ecophysiology of *Drosophila melanogaster* and *D. simulans*. *Genetica*  
739 **120**: 151-163.
- 740 Deutsch, C. A., J. J. Tewksbury, R. B. Huey, K. S. Sheldon, C. K. Ghalambor, D. C. Haak and P. R.  
741 Martin. 2008. Impacts of climate warming on terrestrial ectotherms across latitude. *Proc. Natl. Acad.*  
742 *Sci.* **105**: 6668-6672.
- 743 Fox J. and S. Weisberg. 2011. An R Companion to Applied Regression. Sage, Thousand Oaks CA.
- 744 Gibert, P., B. Moreteau, G. Petavy, D. Karan and J. R. David. 2001. Chill-coma tolerance, a major  
745 climatic adaptation among *Drosophila* species. *Evolution* **55**: 1063-1068.
- 746 Gilchrist, G.W. 1996. A quantitative genetic analysis of thermal sensitivity in the locomotor  
747 performance curve of *Aphidius ervi*. *Evolution* 50:1560-1572.
- 748 Gilchrist, G. W., L. M. Jeffers, B. West, D. G. Folk, J. Suess and R. B. Huey. 2008. Clinal patterns of  
749 desiccation and starvation resistance in ancestral and invading populations of *Drosophila subobscura*.  
750 *Evol. Appl.* **1**: 513-523.
- 751 Gonzalez, A., O. Ronce, R. Ferriere and M. E. Hochberg. 2013. Evolutionary rescue: an emerging  
752 focus at the intersection between ecology and evolution. *Philos. Trans. R. Soc. Lond., B, Biol. Sci.* **368**:  
753 1610-1631.
- 754 Gosden, T.P., J. T. Waller and E. I. Svensson. 2015. Asymmetric isolating barriers between different  
755 microclimatic environments caused by low immigrant survival. *Proc. R. Soc. Lond., B, Biol. Sci.* **282**:  
756 2410-2459.
- 757 Hansen, T. F. and D. Houle. 2004. Evolvability, stabilizing selection, and the problem of  
758 stasis. Phenotypic integration: studying the ecology and evolution of complex phenotypes. Oxford  
759 University Press, Oxford, 130-150.

- 760 Hoffmann, A. A. 2010. Physiological climatic limits in *Drosophila*: patterns and implications. *J. Exp.*  
761 *Biol.* **213**: 870-880.
- 762 Hoffmann, A. A., S. L. Chown and S. Clusella-Trullas. 2013. Upper thermal limits in terrestrial  
763 ectotherms: how constrained are they? *Funct. Ecol.* **27**: 934-949.
- 764 Holland, B. 2002. Sexual selection fails to promote adaptation to a new environment. *Evolution* **56**:  
765 721-730
- 766 Huang, W., S. Richards, M. A. Carbone, D. H. Zhu, R. R. H. Anholt, J. F. Ayroles, et al. 2012.  
767 Epistasis dominates the genetic architecture of *Drosophila* quantitative traits. *Proc. Natl. Acad. Sci.*  
768 **109**: 15553-15559.
- 769 Huey, R. B. and M. Pascual. 2009. Partial thermoregulatory compensation by a rapidly evolving  
770 invasive species along a latitudinal cline. *Ecology* **90**: 1715-1720.
- 771 Husby, A., D. H. Nussey, M. E. Visser, A. J. Wilson, B. C. Sheldon and L. E. B. Kruuk. 2010.  
772 Contrasting patterns of phenotypic plasticity in reproductive traits in two great tit (*Parus major*)  
773 populations. *Evolution* **64**: 2221-2237.
- 774 Katayama, N., J.K. Abbott, J. Kjaerandsen, Y. Takahashi and E.I. Svensson. 2014. Sexual selection  
775 on wing interference patterns in *Drosophila melanogaster*. *Proc. Natl. Acad. Sci.* **111**:15144-15148.
- 776 Kellermann, V., B. van Heerwaarden, C. M. Sgro and A. A. Hoffmann. 2009. Fundamental  
777 evolutionary limits in ecological traits drive *Drosophila* species distributions. *Science* **325**: 1244-1246.
- 778 Kellermann, V., J. Overgaard, A. A. Hoffmann, C. Flojgaard, J. C. Svenning and V. Loeschcke. 2012.  
779 Upper thermal limits of *Drosophila* are linked to species distributions and strongly constrained  
780 phylogenetically. *Proc. Natl. Acad. Sci.* **109**: 16228-16233.
- 781 Kelly, M. W., E. Sanford and R. K. Grosberg. 2012. Limited potential for adaptation to climate change  
782 in a broadly distributed marine crustacean. *Proc. R. Soc. Lond., B, Biol. Sci.*, **279**: 349-356.
- 783 Kelly, M. W., R. K. Grosberg and E. Sanford. 2013. Trade-Offs, geography, and limits to thermal  
784 adaptation in a tide pool copepod. *Am. Nat.* **181**: 846-854.
- 785 Kimura, M. T. and K. Beppu. 1993. Climatic adaptations in the *Drosophila immigrans* species group -  
786 seasonal migration and thermal tolerance. *Ecol. Entomol.* **18**: 141-149.
- 787 Kristensen, T. N., J. Overgaard, J. Lassen, A. A. Hoffmann and C. Sgro. 2015. Low evolutionary  
788 potential for egg-to-adult viability in *Drosophila melanogaster* at high temperatures. *Evolution* **69**:  
789 803-814.
- 790 Lande, R. 2009. Adaptation to an extraordinary environment by the evolution of phenotypic plasticity  
791 and genetic assimilation. *J. Evol. Biol.* **22**:1435-1446.
- 792 Lande, R. 2014. Evolution of phenotypic plasticity and environmental tolerance of a labile quantitative  
793 character in a fluctuating environment. *J. Evol. Biol.* **27**: 866-875.
- 794 Latimer, C.A.L., Wilson, R.S., and Chenoweth, S.F., 2011. Quantitative genetic variation for thermal  
795 performance curves within and among natural populations of *Drosophila serrata*. *J. Evol.*  
796 *Biol.*, **24**:965-975.
- 797 Long, T.A.F., and Rice, W.R. 2007. Adult locomotory activity mediates intralocus sexual conflict in a  
798 laboratory-adapted population of *Drosophila melanogaster*. *Proc. Biol. Sci.* **274**:3105– 3112.

- 799 Mackay, T. F. C. 2014. Epistasis and quantitative traits: using model organisms to study gene-gene  
800 interactions. *Nat. Rev. Genet.* **15**: 22-33.
- 801 Mackay, T. F. C., S. Richards, E. A. Stone, A. Barbadilla, J. F. Ayroles, D. H. Zhu, et al.. 2012. The  
802 *Drosophila melanogaster* Genetic Reference Panel. *Nature* **482**: 173-178.
- 803 Manenti, T., V. Loeschcke, N. N. Moghadam and J. G. Sorensen. 2015. Phenotypic plasticity is not  
804 affected by experimental evolution in constant, predictable or unpredictable fluctuating thermal  
805 environments. *J. Evol. Biol.* **28**: 2078-2087.
- 806 Martinossi-Allibert I., G. Arnqvist and D. Berger. 2016. Sex-specific selection under environmental  
807 stress in seed beetles. *J. Evol. Biol.* DOI: 10.1111/jeb.12996.
- 808 Mathur, V. and P. S. Schmidt. 2017. Adaptive patterns of phenotypic plasticity in laboratory and field  
809 environments in *Drosophila melanogaster*. *Evolution* **71.2**: 465-474.
- 810 Meffert, L.M., S.K. Hicks and J.L. Regan. 2002. Nonadditive genetic effects in animal behavior. *Am.*  
811 *Nat.* **160**:198-213.
- 812 Merilä, J. and B.C. Sheldon. 1999. Genetic architecture of fitness and nonfitness traits: empirical  
813 patterns and development of ideas. *Heredity* **83**: 103-109.
- 814 Mitchell, K. A. and A. A. Hoffmann. 2010. Thermal ramping rate influences evolutionary potential  
815 and species differences for upper thermal limits in *Drosophila*. *Funct. Ecol.* **24**: 694-700.
- 816 Mukuka, J., O. Strauch, L. Waeyenberge, N. Viaene, M. Moens and R. U. Ehlers. 2010. Heat tolerance  
817 among different strains of the entomopathogenic nematode *Heterorhabditis bacteriophora*. *Biocontrol*  
818 **55**: 423-434.
- 819 Murren, C.J., Auld, J.R., Callahan, H., Ghalambor, C.K., Handelsman, C.A., Heskell, M.A., et al.  
820 2015. Constraints on the evolution of phenotypic plasticity: limits and costs of phenotype and  
821 plasticity. *Heredity*, 115:293-301.
- 822 Olsson, M., E. Wapstra, T. Schwartz, T. Madsen, B. Ujvari and T. Uller. 2011. In hot pursuit:  
823 fluctuating mating system and sexual selection in sand lizards. *Evolution* **65**:574-583.
- 824 Parkash, R., S. Rajpurohit and S. Ramniwas. 2008. Changes in body melanisation and desiccation  
825 resistance in highland vs. lowland populations of *D. melanogaster*. *J. Insect Physiol.* **54**: 1050-1056.
- 826 Parsons, P. A. 1982. Adaptive strategies of colonizing animal species. *Biol. Rev.* **57**: 117-148.
- 827 Pigliucci, M. 2001. Phenotypic plasticity: beyond nature and nurture. John Hopkins University Press,  
828 Baltimore.
- 829 Prevosti, A., G. Ribo, L. Serra, M. Aguade, J. Balana, M. Monclus and F. Mestres. 1988. Colonization  
830 of America by *Drosophila subobscura* - experiment in natural populations that supports the adaptive  
831 role of chromosomal inversion polymorphism. *Proc. Natl. Acad. Sci.* **85**: 5597-5600.
- 832 Price, T. and D. Schluter. 1991. On the low heritability of life-history traits. *Evolution* **45**: 853-861.
- 833 Punzalan, D., F. H. Rodd and L. Rowe. 2008. Sexual selection mediated by the thermoregulatory  
834 effects of male colour pattern in the ambush bug *Phymata americana*. *Proc. R. Soc. Lond., B, Biol.*  
835 *Sci.* **275**:483-492.

- 836 R Development Core Team. 2008. R: A language and environment for statistical computing. R  
837 Foundation for Statistical Computing, Vienna, Austria. ISBN 3-900051-07-0, URL [http://www.R-](http://www.R-project.org)  
838 [project.org](http://www.R-project.org).
- 839 Roberts, S.P., Marden, J.H., and Feder, M.E. 2003. Dropping like flies: environmentally induced  
840 impairment and protection of locomotor performance in adult *Drosophila melanogaster*. *Physiol.*  
841 *Biochem. Zool.* 76:615–621.
- 842 Roff, D.A. 1997. Evolutionary quantitative genetics. Chapman and Hall, New York.
- 843 Rowe, L. and D. Houle. 1996. The lek paradox and the capture of genetic variance by condition  
844 dependent traits. *Proc. R. Soc. Lond., B, Biol. Sci.* **263**: 1415-1421.
- 845 Rundle, H.D., S.F. Chenoweth, and M.W. Blows. 2006. The roles of natural and sexual selection  
846 during adaptation to a novel environment. *Evolution* **60**: 2218-2225
- 847 Schlichting, C. D. and M. Pigliucci. 1998. Phenotypic evolution: a reaction norm perspective. Sinauer  
848 Associates Incorporated, Sunderland.
- 849 Sgrò, C.M., Terblanche, J.S., and Hoffmann, A.A., 2016. What can plasticity contribute to insect  
850 responses to climate change? *Annu. Rev. Entomol.* **61**:433-451.
- 851 Siller, S. 2001. Sexual selection and the maintenance of sex. *Nature* **411**:689-695.
- 852 Sisodia, S. and B. N. Singh. 2010. Resistance to environmental stress in *Drosophila ananassae*:  
853 latitudinal variation and adaptation among populations. *J. Evol. Biol.* **23**: 1979-1988.
- 854 Stevenson, R. D. 1985. The relative importance of behavioral and physiological adjustments  
855 controlling body temperature in terrestrial ectotherms. *Am. Nat.* **126**: 362-386.
- 856 Svensson, E. I. and J. T. Waller. 2013. Ecology and sexual selection: evolution of wing pigmentation  
857 in Calopterygid damselflies in relation to latitude, sexual dimorphism and speciation. *Am. Nat.*  
858 **182**:174-195.
- 859 Symonds, M. R. R. and G. J. Tattersall. 2010. Geographic variation in bill size across bird species  
860 provides evidence for Allen’s rule. *Am. Nat.* **176**:188-197.
- 861 Tattersall, G. J., D. V. Andrade, and A. S. Abe. 2009. Heat exchange from the toucan bill reveals a  
862 controllable vascular thermal radiator. *Science* **325**:468-470.
- 863 Tattersall, G. J. and V. Cadena. 2010. Insights into animal temperature adaptations revealed through  
864 thermal imaging. *Imaging Sci. J.* **58**:261-268.
- 865 Taylor, M.L., T. A. R. Price, A. Skeats and N. Wedell. 2015. Temperature can shape a cline in  
866 polyandry, but only genetic variation can sustain it over time. *Behav. Ecol.* **27**:462-469.
- 867 Trotta, V., F. C. F. Calboli, M. Ziosi, D. Guerra, M. C. Pezzoli, J. R. David and S. Cavicchi. 2006.  
868 Thermal plasticity in *Drosophila melanogaster*: A comparison of geographic populations. *BMC Evol.*  
869 *Biol.*, **6**: 67.
- 870 Visser, M. E. 2008. Keeping up with a warming world; assessing the rate of adaptation to climate  
871 change. *Proc. R. Soc. Lond., B, Biol. Sci.* **275**: 649-659.
- 872 Whitlock, M.C. and A.F. Agrawal. 2009. Purging the genome with sexual selection: reducing mutation  
873 load through selection on males. *Evolution* **63**: 569-582.

874 Wiens, J. J. and C. H. Graham. 2005. *Niche conservatism: Integrating evolution, ecology, and*  
875 *conservation biology*. *Annu. Rev. Ecol. Evol. Syst.* **36**:519-39.

876

877 Yukilevich, R. 2013. Tropics accelerate the evolution of hybrid male sterility in *Drosophila*. *Evolution*  
878 **67**:1805-1814.

879

880

881

882
